# Supplementary material
Source: PubMed Central journal article supplement (PMC3681547)
Supplement: jn.112.169649_nutrition169649SupplementaryData1.pdf [file jn.112.169649_nutrition169649SupplementaryData1.pdf]

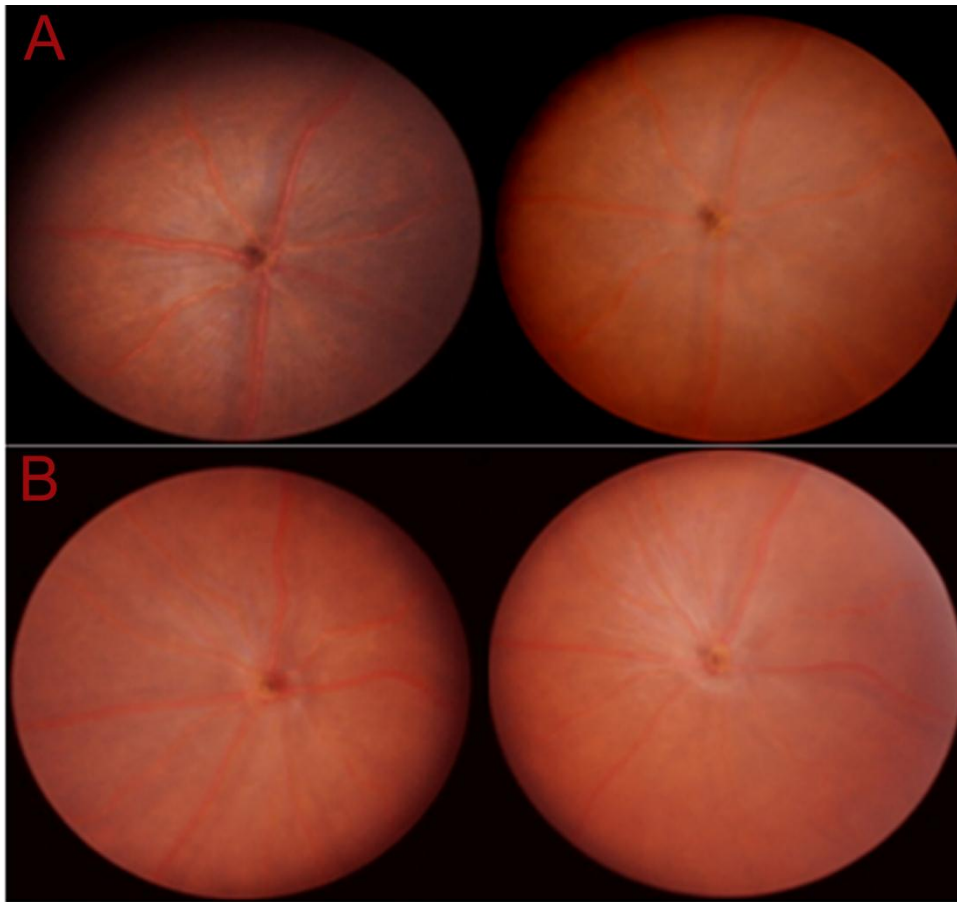

**SUPPLEMENTAL FIGURE 1. Periodic monitoring of fundus lesions in WT mice.** C-WT mice (n=12) (**A**) and A-WT mice (n=14) (**B**) are shown at 1 month of age prior to treatment (left) and after 3 months of treatment (right). No WT mouse developed retinal lesions by 4 mo of age.
