# Supplementary material
Source: PubMed Central journal article supplement (PMC3681547)
Supplement: jn.112.169649_nutrition169649SupplementaryData2.pdf [file jn.112.169649_nutrition169649SupplementaryData2.pdf]

**SUPPLEMENTAL TABLE 1.** Nutrient and nutritional composition of purified pelleted diets<sup>1</sup>

| Ingredient                        | AIN-93G <sup>2</sup> | Control diet | AREDS2 diet |
|-----------------------------------|----------------------|--------------|-------------|
| Casein                            | 200                  | 200          | 200         |
| L-Cystine                         | 3                    | 3            | 3           |
| Sucrose                           | 100                  | 100          | 100         |
| Cornstarch                        | 397                  | 351          | 338         |
| Dyetrose                          | 132                  | 132          | 132         |
| t-Butylhydroquinone               | 0.014                | 0.02         | 0.014       |
| Cellulose                         | 50                   | 50           | 50          |
| Mineral Mix #210025 <sup>3</sup>  | 35                   | 35           | 35          |
| Vitamin Mix # 310025 <sup>4</sup> | 10                   | 10           | 10          |
| Choline Bitartrate                | 2.5                  | 2.5          | 2.5         |
| Soybean Oil                       | 70                   | 117          | 0           |
| Lutein 5%                         | 0                    | 0            | 6.25        |
| Zeaxanthin                        | 0                    | 0            | 1.25        |
| EPA+DHA                           | 0                    | 0            | 51.7        |
| Nutritional composition           | 3.76                 |              |             |
| Total Mcal/kg                     |                      | 4.01         | 4.01        |

<sup>1</sup> Data presented are grams of nutrient /kilogram of diet.

<sup>2</sup> Amounts of each ingredient in the control diet and AREDS2 diet were compared to the respective amount in the standard AIN-93G diet.

<sup>3,4</sup> Dyets Inc. mixes

**SUPPLEMENTAL TABLE 2.** Micronutrient content assay of purified pelleted diets<sup>1</sup>

|           | <u>Control diet</u> |              |                     | <u>AREDS2 diet</u> |            |                     |
|-----------|---------------------|--------------|---------------------|--------------------|------------|---------------------|
|           | Lutein              | Zeaxanthin   | LCPUFA<br>(EPA+DHA) | Lutein             | Zeaxanthin | LCPUFA<br>(EPA+DHA) |
| Claim     | 0                   | 0            | 0 + 0               | 1.76               | 0.351      | 215 + 107           |
| 0 Weeks   | undetectable        | undetectable | undetectable        | 2.29               | 0.492      | 225 + 115           |
| (% Claim) | 100%                | 100%         | 100%                | (130%)             | (140%)     | (104% + 107%)       |
| 4 Weeks   | *                   | *            | *                   | 2.29               | 0.404      | 214 + 109           |
| (% Claim) |                     |              |                     | (130%)             | (115%)     | (100% + 102%)       |
| 9 Weeks   | *                   | *            | *                   | 2.46               | 0.457      | 226 + 144           |
| (% Claim) |                     |              |                     | (140%)             | (130%)     | (105% + 107%)       |

\* assay not repeated

<sup>1</sup> Amounts presented are in  $\mu\text{mol}$  per 4 g of diet, the average daily amount consumed per mouse.

Molecular weights used for calculation are: lutein 569 g/mol, zeaxanthin 569 g/mol, DHA 328 g/mol, and EPA 302 g/mol.
